1 Influence of *APOA5* locus on the treatment efficacy of  
2 three statins: evidence from a randomized pilot study in  
3 Chinese subjects

4

5 Sha Hua<sup>1</sup>, Chuanxiang Ma<sup>2</sup>, Jun Zhang<sup>3</sup>, Jing Li<sup>1</sup>, Weiwei Wu<sup>1</sup>, Ning Xu<sup>4</sup>, Guanghua Luo<sup>3,\*</sup>,  
6 Jianrong Zhao<sup>1,\*</sup>

7

8 <sup>1</sup>Department of Cardiology, Ruijin Hospital Luwan Branch, School of Medicine, Shanghai Jiao  
9 Tong University, South Chongqing Rd. No.149, Shanghai 200020, China.

10 <sup>2</sup>Department of Pathology, The Affiliated Hospital of Weifang Medical University, Weifang  
11 261000, China.

12 <sup>3</sup>Comprehensive Laboratory, Third Affiliated Hospital of Soochow University, 185 Juqian Street,  
13 Changzhou 213003, China.

14 <sup>4</sup>Section of Clinical Chemistry and Pharmacology, Institute of Laboratory Medicine, Lund  
15 University, S-221 85 Lund, Sweden.

16 \*Corresponding authors: Guanghua Luo ([shineroar@163.com](mailto:shineroar@163.com)) or Jianrong Zhao ([drzjr@126.com](mailto:drzjr@126.com))

17 Running title: *APOA5* and statin interactions

18 Abbreviations: ApoA5, apolipoprotein A5; BMI, body mass index; FFA, free fatty acids; HDLc,  
19 high-density lipoprotein cholesterol; LDLc, low-density lipoprotein cholesterol; Lp(a),  
20 lipoprotein(a); SNP, single nucleotide polymorphism; T2D, type 2 diabetes; Tc, total cholesterol;  
21 Tg, triglycerides.

## 22 **Abstract**

23 Pharmacogenetics or pharmacogenomics approaches are important for addressing the individual  
24 variabilities of drug efficacy especially in the era of precision medicine. One particular interesting  
25 gene to investigate is *APOA5* which has been repeatedly linked with the inter-individual  
26 variations of serum triglycerides. Here, we explored *APOA5*-statin interactions in 195 Chinese  
27 subjects randomized to rosuvastatin (5-10 mg/day), atorvastatin (10-20 mg/day), or simvastatin  
28 (40 mg/day) for 12 weeks by performing a targeted genotyping analysis of the *APOA5* promoter  
29 SNP rs662799 (-1131T>C). There were no significant differences between the treatment arms for  
30 any of the statin-induced changes in clinical biomarkers. Reductions in LDL cholesterol were  
31 influenced by the *APOA5* genotype in all three treatment groups. By contrast, changes in HDL  
32 cholesterol and triglycerides were only affected by the *APOA5* genotype in the atorvastatin and  
33 simvastatin groups and not in the rosuvastatin group. Our results support earlier findings  
34 indicating that rosuvastatin is a better treatment option and that future studies should consider  
35 stratifying subjects not only by genetic background but also by statin type.

36 **Keywords:** *APOA5* genotype, statins, triglycerides, dyslipidemia

## 37 Introduction

38 Although statins are the most prescribed class of drugs worldwide for prevention of various  
39 cardiovascular diseases, about one third of patients do not respond well to this therapy with  
40 respect to the lipid-lowering effect, suggesting that pharmacogenomics (Postmus et al., 2014) or  
41 other environmental factors such as diet (Jenkins et al., 2005) or the gut microbiome (Kaddurah-  
42 Daouk et al., 2011) may play substantial roles. To date, genome-wide association studies have  
43 identified at least 39 genes that are associated with statin treatment efficacy (Gryn and Hegele,  
44 2014). Most of these genes are involved in either the direct pharmacokinetic handling of statins or  
45 in lipid metabolism pathways especially these involving cholesterol, the main target of statin  
46 therapy (Mangravite et al., 2006). However, accumulating evidence indicates that statins can also  
47 lower levels of triglycerides, potentially through altering degradation of apolipoprotein B (ApoB)  
48 and related very low-density lipoprotein (VLDL) balance, although the precise mechanism  
49 remains unclear (Ginsberg et al., 1987; Arad et al., 1992; Ginsberg, 1998).

50 One gene of particular interest within this context is *APOA5*, which has been repeatedly  
51 associated with the high inter-individual variations of serum triglycerides in all reported  
52 populations (Baum et al., 2003; Lai et al., 2004; Hubacek et al., 2008; Ouatou et al., 2014; Son et  
53 al., 2015) since its identification in 2001 (Pennacchio et al., 2001; van der Vliet et al., 2001).  
54 According to one estimation, the *APOA5* promoter SNP rs662799 (-1131T>C) alone can  
55 contribute to 6.2% of the genetic component of hypertriglyceridemia (Hegele, 2009). Of note, the  
56 minor C allele is much more common in the Asian population (26%-40%) than in Caucasians  
57 (only ~8%) (Baum et al., 2003). In addition, accumulating evidence suggests that this gene also  
58 confers risk for cardiovascular disease (Lai et al., 2004) and myocardial infarction (Do et al.,  
59 2015). Although previous studies have suggested a link between this gene and statin treatment  
60 (Brautbar et al., 2011; O'Brien et al., 2015), available statins differ in terms of their  
61 pharmacodynamic and pharmacogenetic properties (Kivisto et al., 2004; Schachter, 2005) and  
62 potency (Palmer et al., 2013; Arshad, 2014; Karlson et al., 2016). To the best of our knowledge,  
63 no well-designed prospective study, has investigated whether *APOA5*-statin interactions  
64 dependent on the statin type while controlling for differences in potency of the statins. One  
65 retrospective study did not observe an effect of statin type when investigating the interaction  
66 between the *APOA5* rs662799 variants and statins (Hubacek et al., 2009); however, this study did  
67 not include rosuvastatin, which is often considered to be a better treatment choice (Scott et al.,  
68 2004; McKenney, 2005; Schachter, 2005).

69 Here, we performed a pilot study to explore *APOA5*-statin interactions in 195 Chinese subjects  
70 randomized to rosuvastatin, atorvastatin, or simvastatin therapy for 12 weeks. To address whether  
71 the clinical responses of three types of statins differ between subjects with the same *APOA5*  
72 genetic background, we genotyped *APOA5* rs662799 SNP and measured the fasting plasma  
73 concentrations of triglycerides, cholesterols, free fatty acids, and four apolipoproteins both before  
74 and after statin treatments.

## 75 Materials and Methods

### 76 Study subjects and study design

77

78 We recruited 195 patients at Shanghai Ruijin Hospital Luwan Branch (affiliated to Shanghai  
79 Jiaotong University). In brief, the inclusion criteria were: (i) aged 18 years or older; (ii) newly  
80 diagnosed with dyslipidemia and/or increased risk of atherosclerotic cardiovascular disease and  
81 recommended to receive statins according to the 2013 American College of Cardiology (ACC)  
82 and the American Heart Association (AHA) Blood Cholesterol Guidelines (Stone et al., 2014);  
83 (iii) absence of major systematic diseases such as malignancy; and (iv) without medication  
84 (especially antibiotics) in the previous three months except antihypertensive therapy.

85 The subjects were then randomly divided into three treatment arms to receive rosuvastatin (5-10  
86 mg per day), atorvastatin (10-20 mg per day), or simvastatin (40 mg per day) for 12 weeks. To  
87 achieve comparable clinical efficacies in response to the three statins, the different statin doses  
88 were selected based on both clinical practice and evidence suggesting that each rosuvastatin dose  
89 is equivalent to 3-3.5 times of atorvastatin and 7-8 times of simvastatin (at least in terms of  
90 cholesterol reduction) (Hubacek et al., 2009). All treatments were tolerated with no side effects  
91 reported.

92 Written informed consent was obtained from all the study participants. This study conforms to the  
93 ethical guidelines of the 1975 Declaration of Helsinki and was approved by Ethics Committee of  
94 Shanghai Ruijin Hospital Luwan Branch. Complete clinical trial registration is deposited at  
95 [chictr.org.cn](http://chictr.org.cn) (ChiCTR-RRC-16010131).

## 96 **Laboratory analyses**

97 Fasting plasma concentrations of triglycerides, total cholesterol, HDL cholesterol (HDLc), LDL  
98 cholesterol (LDLc), free fatty acids (FFA), and three different apolipoproteins (ApoA1, ApoB-  
99 100, ApoE) and lipoprotein(a) were measured by enzymatic methods using a Beckman Coulter  
100 Chemistry Analyzer AU5800 Series (United States) at both baseline and 12 weeks after  
101 treatments. ApoA5 was not measured since consistent evidence suggests rs662799  
102 polymorphisms were not associated with the circulating levels of this apolipoprotein (Talmud et  
103 al., 2006; Henneman et al., 2007)

104 DNA was isolated using the TIANamp Blood DNA kit (purchased from Tiangen, Beijing, China)  
105 and individual *APOA5* variants (-1131T>C – rs662799) were genotyped using a base-quenched  
106 probe method combined with polymerase chain reaction (PCR) as described before (Luo et al.,  
107 2009). In brief, a 19-nt probe (5'-GGCAAATCTCACTTTCGCT-3') containing the targeted SNP  
108 site was first conjugated with 6-carboxyfluorescein and then hybridized to its complementary  
109 target sequence from PCR amplification. An analytical melting program that involves heating the  
110 amplicon/probe heteroduplex will produce different fluorescence curves depending on the  
111 genotypes of rs662799. Both the probe and primers (forward: 5'-  
112 AGGAGTGTGGTAGAAAGACCTGTTG-3'; reverse: 5'-  
113 AACTACCCAGAGTCACTGTGTCCC-3') used were synthesized by Sangon (Shanghai, China).

## 114 **Statistical analysis**

115 Statistical differences between groups were estimated by Wilcox rank-sum test (between two  
116 groups), Kruskal-Wallis test (among three groups) for continuous variables or by Chi-square test  
117 for categorical variables. Different linear regression models were also built and compared using  
118 Chi-square test to confirm the effect of *APOA5* genotype on different biomarkers and adjusted for  
119 contributions from type 2 diabetes and sex. Associations between apolipoproteins and  
120 concentrations of LDLc and HDLc were measured by Spearman's rank correlation analysis.  
121 Hardy-Weinberg Equilibrium was accessed by exact test based on R package "HardyWeinberg"  
122 (Graffelman, 2015). Raw P values were adjusted by the Benjamini-Hochberg method (Benjamini  
123 and Hochberg, 1995) with a false discovery rate of 5%. A power of 99.98% was obtained using  
124 pwr package (Champely, 2015) for this study based on 65 patients with paired design, 5%  
125 significance, and an estimated effect size of 0.7 for statin in reducing LDL cholesterol  
126 (Cholesterol Treatment Trialists et al., 2012; Ridker et al., 2016). All statistical tests and data

127 visualizations as well as the stratified randomization process by considering BMI as covariate  
128 were performed under the R environment (Team, 2015).

## 129 Results and discussion

### 130 Baseline characteristics

131 The minor C allele frequency of *APOA5* rs662799 SNP in our cohort was 30%, consistent with  
132 other reports based on larger Chinese cohorts (Baum et al., 2003; Jiang et al., 2010); the genotype  
133 frequency of *APOA5* was in agreement with Hardy-Weinberg equilibrium ( $n = 13, 91$  and  $91$  for  
134 C/C, T/C, and T/T allele carriers, respectively;  $P=0.171$ ). T/C and C/C subjects were pooled as  
135 T(C)/C ( $n = 104$ ) for further analyses to increase the power. With the exception of ApoE, there  
136 were no significant baseline differences between the treatment arms, including the frequencies of  
137 the T(C)/C and T/T genotypes ( $P=0.342$ ) (**Table 1**). These data suggest that the treatment groups  
138 are in general homogeneous and this study design is suitable for addressing the relationship  
139 between *APOA5* variations and the clinical responses of three statins. When dividing the subjects  
140 by genotype, the T(C)/C allele carriers had significantly higher plasma triglycerides than T/T  
141 carriers at baseline (**Table 1**), in agreement with previous studies (Baum et al., 2003; Lai et al.,  
142 2004; Jiang et al., 2010).

143 We also noted that subjects with the T(C)/C genotype had higher LDLc than T/T carriers at  
144 baseline (**Table 1**); these findings were consistent with observations in a larger cohort (Lai et al.,  
145 2004) but an earlier study in Chinese men did not observe significant *APOA5*-LDLc interactions  
146 (Baum et al., 2003). It is not clear how *APOA5* variants affect LDLc as ApoA5 has only been  
147 detected on HDL and VLDL and not on LDL particles (Ballantyne et al., 2006). However,  
148 ApoA5 has been shown to directly interact with members of the LDL-receptor family (Nilsson et  
149 al., 2007). In addition, an earlier study has shown a significant association between the *APOA5*  
150 rs662799 SNP and increased risk of early-onset myocardial infarction even after adjusting for  
151 triglycerides (De Caterina et al., 2011), providing further evidence that this SNP may  
152 simultaneously affect other atherogenic lipids such as LDLc. It is also possible that this SNP is in  
153 complete linkage disequilibrium with other polymorphism(s) that can explain the observed LDLc  
154 levels.

155 **Rosuvastatin-induced changes in HDLc and triglycerides are not affected by**  
156 **APOA5 genotype**

157 We next compared the clinical efficacies (in terms of cholesterol, triglyceride, and apolipoprotein  
158 changes) of the statins. As expected, all three statins promoted significant reductions in total  
159 cholesterol, ApoB, LDLc, ApoE and triglycerides and significant increases in ApoA1 and HDLc  
160 (**Figure 1A**). However, there were no significant differences between the treatment arms for any  
161 of the statin-induced changes in clinical biomarkers after adjusting for multiple testing (false  
162 discovery rate 5%), confirming that the response to 5-10 mg of rosuvastatin is similar to that of  
163 10-20 mg atorvastatin and 40 mg of simvastatin as suggested previously (Hubacek et al., 2009).  
164 In agreement, results from a meta-analysis (Karlson et al., 2016), comparative pharmacology  
165 (McTaggart, 2003) and the MERCURY II clinical trial (Ballantyne et al., 2006) have all shown  
166 that rosuvastatin is more potent than the other statins and thus lower doses can be used to achieve  
167 equivalent responses.

168 To determine how *APOA5* variations affected the clinical responses of the three statins, we  
169 investigated how changes in the biomarker concentrations in response to each statin varied  
170 between subjects with the T(C)/C or T/T genotype (**Figure 1B-E; Supplementary Table S1**).  
171 Genotype did not affect the changes in total cholesterol (**Figure 1B**), apolipoproteins, FFA or  
172 lipoprotein(a) (data not shown) in response to any of the three statins. However, patients  
173 homozygous for the major T allele (T/T genotype) not only exhibited lower baseline LDLc levels  
174 (**Table 1**) but also demonstrated significantly larger LDLc reductions compared with the C allele  
175 carriers, independent of the type of statin used (**Figure 1C**). By contrast, rosuvastatin-induced  
176 changes in HDLc and triglycerides showed little variation between patients with the T(C)/C and  
177 T/T genotypes whereas changes in HDLc and triglycerides were more pronounced in T/T  
178 compared with T(C)/T carriers upon atorvastatin or simvastatin treatment (**Figure 1D,E**). These  
179 data suggest that rosuvastatin-induced responses may be less affected by *APOA5* variations than  
180 the other two statins. The results were still valid after adjusting for type 2 diabetes and sex  
181 (**Supplementary Table S2**). It has been suggested that the hydrophilic rosuvastatin is largely  
182 excreted unchanged (Martin et al., 2003) whereas the other two lipophilic statins undergo  
183 substantial metabolism by the CYP450 pathways and thus are more affected by gene  
184 polymorphisms (Kivisto et al., 2004; Schachter, 2005), consistent with our findings. Additionally,  
185 rosuvastatin differs from the other statins by its stronger binding to 3-hydroxy-3-methylglutaryl  
186 coenzyme A (HMG-CoA) reductase, lower systemic bioavailability, longer elimination half-life  
187 (McTaggart, 2003) and greater hepatoselectivity (Schachter, 2005). These physio-biochemical



188 differences may also potentially contribute to the different treatment responses according to  
189 genotype. However, to fully understand how *APOA5* affects statin treatments, in-depth  
190 characterizations of its functional role are needed.

## 191 **Statin-APOA5 interactions altered the correlations between apolipoproteins** 192 **and LDLc/HDLc**

193 Although most therapies to reduce cardiovascular disease risk currently focus on reduction of  
194 LDLc and triglycerides, atherogenic proteins such as ApoB have also been suggested to have  
195 great predictive value (Ballantyne et al., 2008). Accordingly, the American Diabetes Association  
196 and the American College of Cardiology Foundation recommend that therapy for patients with  
197 high cardiovascular disease risk should aim to lower ApoB concentrations to below 90 mg/dl in  
198 addition to reducing LDLc levels (Brunzell et al., 2008). To address whether the well-known  
199 strong associations between ApoB and LDLc both before and after statin treatments (Ballantyne et  
200 al., 2008) differ among patients with different *APOA5* genotypes, we additionally analyzed  
201 ApoB-LDLc correlations within each *APOA5* SNP subgroup. Before treatment, strong and  
202 significant positive correlations were observed between ApoB and LDLc for both T(C)/C  
203 (Spearman coefficient  $\rho=0.55$ ;  $P<0.001$ ) and T/T carriers ( $\rho=0.78$ ;  $P<0.001$ ; **Figure 2A**).  
204 After treatment, a comparable strong correlation only existed for the C allele carriers ( $\rho=0.50$ ;  
205  $P<0.001$ ; **Figure 2B**). In contrast, the dramatic decrease in the ApoB-LDLc correlation among  
206 T/T carriers (from 0.78 to 0.44) indicates the statin-induced reduction of ApoB in absolute values  
207 was much smaller than reduction of LDLc. Thus, further treatment to reduce the levels of ApoB  
208 even after achieving recommended LDLc reductions could be beneficial in T/T carriers. Similar  
209 observations were found between ApoA1 and HDLc (**Supplementary Figure S1**).

## 210 **Conclusion**

211 In summary, our results show that low-dose rosuvastatin achieves improvements in clinical  
212 responses that are comparable to those observed with higher doses of atorvastatin and simvastatin  
213 but are less affected by *APOA5* genotype. These findings support the growing recognition that  
214 rosuvastatin is a potentially better treatment option for patients with dyslipidemia and/or at high  
215 risk of cardiovascular diseases. In addition, integrated efforts, such as the NIH Pharmacogenetics  
216 Research Network (Giacomini et al., 2007), should be encouraged in the era of precision  
217 medicine to accelerate pharmacogenetics or pharmacogenomics research. Future studies should  
218 also consider stratifying populations by genetic background and by statin type.



## 219 Conflict of Interest

220 The authors declare no conflict of interest.

## 221 Author contributions

222 S.H., G.L., N.X. and J.Z. designed the study; S.H. performed the randomization process and  
223 clinical intervention; J.L. and W.W. enrolled participants and measured the lipids and  
224 apolipoproteins; J.Z. and G.L. performed the genotyping analysis; S.H., C.M., J.L. and W.W.  
225 collected and analyzed the data; S.H., C.M, G.L. and J.Z. wrote the manuscript.

## 226 Acknowledgements

227 The authors would like to thank Dr. Hao Wu and Prof. Jan Borén from University of Gothenburg  
228 as well as Dr. Bingxiang Xu from Beijing Institute of Genomics for help discussions on the  
229 manuscript and data analysis. We also appreciate the great help from Dr. Rosie Perkins for editing  
230 our manuscript. This study was supported by a funding to S.H. from the Science Committee  
231 Foundation of Huangpu District, Shanghai, China (HKW201503).

## 232 References

- 233 Arad, Y., Ramakrishnan, R., and Ginsberg, H.N. (1992). Effects of lovastatin therapy on very-low-  
234 density lipoprotein triglyceride metabolism in subjects with combined hyperlipidemia:  
235 evidence for reduced assembly and secretion of triglyceride-rich lipoproteins.  
236 *Metabolism* 41(5), 487-493.
- 237 Arshad, A.R. (2014). Comparison of low-dose rosuvastatin with atorvastatin in lipid-lowering  
238 efficacy and safety in a high-risk pakistani cohort: an open-label randomized trial. *J*  
239 *Lipids* 2014, 875907. doi: 10.1155/2014/875907.
- 240 Ballantyne, C.M., Bertolami, M., Hernandez Garcia, H.R., Nul, D., Stein, E.A., Theroux, P., et al.  
241 (2006). Achieving LDL cholesterol, non-HDL cholesterol, and apolipoprotein B target  
242 levels in high-risk patients: Measuring Effective Reductions in Cholesterol Using  
243 Rosuvastatin therapy (MERCURY) II. *Am Heart J* 151(5), 975 e971-979. doi:  
244 10.1016/j.ahj.2005.12.013.
- 245 Ballantyne, C.M., Raichlen, J.S., and Cain, V.A. (2008). Statin therapy alters the relationship  
246 between apolipoprotein B and low-density lipoprotein cholesterol and non-high-density  
247 lipoprotein cholesterol targets in high-risk patients: the MERCURY II (Measuring  
248 Effective Reductions in Cholesterol Using Rosuvastatin) trial. *J Am Coll Cardiol* 52(8),  
249 626-632. doi: 10.1016/j.jacc.2008.04.052.
- 250 Baum, L., Tomlinson, B., and Thomas, G.N. (2003). APOA5-1131T>C polymorphism is associated  
251 with triglyceride levels in Chinese men. *Clin Genet* 63(5), 377-379.

- 252 Benjamini, Y., and Hochberg, Y. (1995). Controlling the False Discovery Rate: A Practical and  
253 Powerful Approach to Multiple Testing. *Journal of the Royal Statistical Society. Series B*  
254 *(Methodological)* 57(1), 289-300. doi: 10.2307/2346101.
- 255 Brautbar, A., Covarrubias, D., Belmont, J., Lara-Garduno, F., Virani, S.S., Jones, P.H., et al. (2011).  
256 Variants in the APOA5 gene region and the response to combination therapy with  
257 statins and fenofibric acid in a randomized clinical trial of individuals with mixed  
258 dyslipidemia. *Atherosclerosis* 219(2), 737-742. doi:  
259 10.1016/j.atherosclerosis.2011.08.015.
- 260 Brunzell, J.D., Davidson, M., Furberg, C.D., Goldberg, R.B., Howard, B.V., Stein, J.H., et al. (2008).  
261 Lipoprotein management in patients with cardiometabolic risk: consensus conference  
262 report from the American Diabetes Association and the American College of Cardiology  
263 Foundation. *J Am Coll Cardiol* 51(15), 1512-1524. doi: 10.1016/j.jacc.2008.02.034.
- 264 Champely, S. (2015). pwr: Basic Functions for Power Analysis. *R package version 1.1-3*.  
265 <http://CRAN.R-project.org/package=pwr>.
- 266 Cholesterol Treatment Trialists, C., Mihaylova, B., Emberson, J., Blackwell, L., Keech, A., Simes, J.,  
267 et al. (2012). The effects of lowering LDL cholesterol with statin therapy in people at low  
268 risk of vascular disease: meta-analysis of individual data from 27 randomised trials.  
269 *Lancet* 380(9841), 581-590. doi: 10.1016/S0140-6736(12)60367-5.
- 270 De Caterina, R., Talmud, P.J., Merlini, P.A., Foco, L., Pastorino, R., Altshuler, D., et al. (2011).  
271 Strong association of the APOA5-1131T>C gene variant and early-onset acute  
272 myocardial infarction. *Atherosclerosis* 214(2), 397-403. doi:  
273 10.1016/j.atherosclerosis.2010.11.011.
- 274 Do, R., Stitzel, N.O., Won, H.H., Jorgensen, A.B., Duga, S., Angelica Merlini, P., et al. (2015).  
275 Exome sequencing identifies rare LDLR and APOA5 alleles conferring risk for myocardial  
276 infarction. *Nature* 518(7537), 102-106. doi: 10.1038/nature13917.
- 277 Giacomini, K.M., Brett, C.M., Altman, R.B., Benowitz, N.L., Dolan, M.E., Flockhart, D.A., et al.  
278 (2007). The pharmacogenetics research network: from SNP discovery to clinical drug  
279 response. *Clin Pharmacol Ther* 81(3), 328-345. doi: 10.1038/sj.clpt.6100087.
- 280 Ginsberg, H.N. (1998). Effects of statins on triglyceride metabolism. *Am J Cardiol* 81(4A), 32B-  
281 35B.
- 282 Ginsberg, H.N., Le, N.A., Short, M.P., Ramakrishnan, R., and Desnick, R.J. (1987). Suppression of  
283 apolipoprotein B production during treatment of cholesteryl ester storage disease with  
284 lovastatin. Implications for regulation of apolipoprotein B synthesis. *J Clin Invest* 80(6),  
285 1692-1697. doi: 10.1172/JCI113259.
- 286 Graffelman, J. (2015). Exploring Diallelic Genetic Markers: The HardyWeinberg Package. 2015  
287 64(3), 1-23. doi: 10.18637/jss.v064.i03.
- 288 Gryn, S.E., and Hegele, R.A. (2014). Pharmacogenomics, lipid disorders, and treatment options.  
289 *Clin Pharmacol Ther* 96(1), 36-47. doi: 10.1038/clpt.2014.82.
- 290 Hegele, R.A. (2009). Plasma lipoproteins: genetic influences and clinical implications. *Nat Rev*  
291 *Genet* 10(2), 109-121. doi: 10.1038/nrg2481.
- 292 Henneman, P., Schaap, F.G., Havekes, L.M., Rensen, P.C., Frants, R.R., van Tol, A., et al. (2007).  
293 Plasma apoAV levels are markedly elevated in severe hypertriglyceridemia and  
294 positively correlated with the APOA5 S19W polymorphism. *Atherosclerosis* 193(1), 129-  
295 134. doi: 10.1016/j.atherosclerosis.2006.05.030.
- 296 Hubacek, J.A., Adamkova, V., Prusikova, M., Snejdrlova, M., Hirschfeldova, K., Lanska, V., et al.  
297 (2009). Impact of apolipoprotein A5 variants on statin treatment efficacy.  
298 *Pharmacogenomics* 10(6), 945-950. doi: 10.2217/pgs.09.17.

- 299 Hubacek, J.A., Lanska, V., Skodova, Z., Adamkova, V., and Poledne, R. (2008). Sex-specific  
300 interaction between APOE and APOA5 variants and determination of plasma lipid levels.  
301 *Eur J Hum Genet* 16(1), 135-138. doi: 10.1038/sj.ejhg.5201941.
- 302 Jenkins, D.J., Kendall, C.W., Marchie, A., Faulkner, D.A., Wong, J.M., de Souza, R., et al. (2005).  
303 Direct comparison of a dietary portfolio of cholesterol-lowering foods with a statin in  
304 hypercholesterolemic participants. *Am J Clin Nutr* 81(2), 380-387.
- 305 Jiang, C.Q., Liu, B., Cheung, B.M., Lam, T.H., Lin, J.M., Li Jin, Y., et al. (2010). A single nucleotide  
306 polymorphism in APOA5 determines triglyceride levels in Hong Kong and Guangzhou  
307 Chinese. *Eur J Hum Genet* 18(11), 1255-1260. doi: 10.1038/ejhg.2010.93.
- 308 Kaddurah-Daouk, R., Baillie, R.A., Zhu, H., Zeng, Z.B., Wiest, M.M., Nguyen, U.T., et al. (2011).  
309 Enteric microbiome metabolites correlate with response to simvastatin treatment. *PLoS*  
310 *One* 6(10), e25482. doi: 10.1371/journal.pone.0025482.
- 311 Karlson, B.W., Palmer, M.K., Nicholls, S.J., Lundman, P., and Barter, P.J. (2016). Doses of  
312 rosuvastatin, atorvastatin and simvastatin that induce equal reductions in LDL-C and  
313 non-HDL-C: Results from the VOYAGER meta-analysis. *Eur J Prev Cardiol* 23(7), 744-747.  
314 doi: 10.1177/2047487315598710.
- 315 Kivisto, K.T., Niemi, M., Schaeffeler, E., Pitkala, K., Tilvis, R., Fromm, M.F., et al. (2004). Lipid-  
316 lowering response to statins is affected by CYP3A5 polymorphism. *Pharmacogenetics*  
317 14(8), 523-525.
- 318 Lai, C.Q., Demissie, S., Cupples, L.A., Zhu, Y., Adiconis, X., Parnell, L.D., et al. (2004). Influence of  
319 the APOA5 locus on plasma triglyceride, lipoprotein subclasses, and CVD risk in the  
320 Framingham Heart Study. *J Lipid Res* 45(11), 2096-2105. doi: 10.1194/jlr.M400192-  
321 JLR200.
- 322 Luo, G., Zheng, L., Zhang, X., Zhang, J., Nilsson-Ehle, P., and Xu, N. (2009). Genotyping of single  
323 nucleotide polymorphisms using base-quenched probe: a method does not invariably  
324 depend on the deoxyguanosine nucleotide. *Anal Biochem* 386(2), 161-166. doi:  
325 10.1016/j.ab.2008.11.032.
- 326 Mangravite, L.M., Thorn, C.F., and Krauss, R.M. (2006). Clinical implications of  
327 pharmacogenomics of statin treatment. *Pharmacogenomics J* 6(6), 360-374. doi:  
328 10.1038/sj.tpj.6500384.
- 329 Martin, P.D., Warwick, M.J., Dane, A.L., Hill, S.J., Giles, P.B., Phillips, P.J., et al. (2003).  
330 Metabolism, excretion, and pharmacokinetics of rosuvastatin in healthy adult male  
331 volunteers. *Clin Ther* 25(11), 2822-2835.
- 332 McKenney, J.M. (2005). Efficacy and safety of rosuvastatin in treatment of dyslipidemia. *Am J*  
333 *Health Syst Pharm* 62(10), 1033-1047.
- 334 McTaggart, F. (2003). Comparative pharmacology of rosuvastatin. *Atheroscler Suppl* 4(1), 9-14.
- 335 Nilsson, S.K., Lookene, A., Beckstead, J.A., Gliemann, J., Ryan, R.O., and Olivecrona, G. (2007).  
336 Apolipoprotein A-V interaction with members of the low density lipoprotein receptor  
337 gene family. *Biochemistry* 46(12), 3896-3904. doi: 10.1021/bi7000533.
- 338 O'Brien, S.E., Schrodi, S.J., Ye, Z., Brilliant, M.H., Virani, S.S., and Brautbar, A. (2015). Differential  
339 Lipid Response to Statins Is Associated With Variants in the BUD13-APOA5 Gene Region.  
340 *J Cardiovasc Pharmacol* 66(2), 183-188. doi: 10.1097/FJC.0000000000000261.
- 341 Ouatou, S., Ajjemami, M., Charoute, H., Sefri, H., Ghalim, N., Rhaissi, H., et al. (2014). Association  
342 of APOA5 rs662799 and rs3135506 polymorphisms with arterial hypertension in  
343 Moroccan patients. *Lipids Health Dis* 13, 60-68. doi: 10.1186/1476-511X-13-60.
- 344 Palmer, M.K., Nicholls, S.J., Lundman, P., Barter, P.J., and Karlson, B.W. (2013). Achievement of  
345 LDL-C goals depends on baseline LDL-C and choice and dose of statin: an analysis from

346 the VOYAGER database. *Eur J Prev Cardiol* 20(6), 1080-1087. doi:  
347 10.1177/2047487313489875.

348 Pennacchio, L.A., Olivier, M., Hubacek, J.A., Cohen, J.C., Cox, D.R., Fruchart, J.C., et al. (2001). An  
349 apolipoprotein influencing triglycerides in humans and mice revealed by comparative  
350 sequencing. *Science* 294(5540), 169-173. doi: 10.1126/science.1064852.

351 Postmus, I., Trompet, S., Deshmukh, H.A., Barnes, M.R., Li, X., Warren, H.R., et al. (2014).  
352 Pharmacogenetic meta-analysis of genome-wide association studies of LDL cholesterol  
353 response to statins. *Nat Commun* 5, 5068. doi: 10.1038/ncomms6068.

354 Ridker, P.M., Mora, S., Rose, L., and Group, J.T.S. (2016). Percent reduction in LDL cholesterol  
355 following high-intensity statin therapy: potential implications for guidelines and for the  
356 prescription of emerging lipid-lowering agents. *Eur Heart J* 37(17), 1373-1379. doi:  
357 10.1093/eurheartj/ehw046.

358 Schachter, M. (2005). Chemical, pharmacokinetic and pharmacodynamic properties of statins:  
359 an update. *Fundam Clin Pharmacol* 19(1), 117-125. doi: 10.1111/j.1472-  
360 8206.2004.00299.x.

361 Scott, L.J., Curran, M.P., and Figgitt, D.P. (2004). Rosuvastatin: a review of its use in the  
362 management of dyslipidemia. *Am J Cardiovasc Drugs* 4(2), 117-138.

363 Son, K.Y., Son, H.Y., Chae, J., Hwang, J., Jang, S., Yun, J.M., et al. (2015). Genetic association of  
364 APOA5 and APOE with metabolic syndrome and their interaction with health-related  
365 behavior in Korean men. *Lipids Health Dis* 14, 105-113. doi: 10.1186/s12944-015-0111-5.

366 Stone, N.J., Robinson, J.G., Lichtenstein, A.H., Bairey Merz, C.N., Blum, C.B., Eckel, R.H., et al.  
367 (2014). 2013 ACC/AHA guideline on the treatment of blood cholesterol to reduce  
368 atherosclerotic cardiovascular risk in adults: a report of the American College of  
369 Cardiology/American Heart Association Task Force on Practice Guidelines. *Circulation*  
370 129(25 Suppl 2), S1-45. doi: 10.1161/01.cir.0000437738.63853.7a.

371 Talmud, P.J., Cooper, J.A., Hattori, H., Miller, I.P., Miller, G.J., and Humphries, S.E. (2006). The  
372 apolipoprotein A-V genotype and plasma apolipoprotein A-V and triglyceride levels:  
373 prospective risk of type 2 diabetes. Results from the Northwick Park Heart Study II.  
374 *Diabetologia* 49(10), 2337-2340. doi: 10.1007/s00125-006-0387-0.

375 Team, R.C. (2015). R: A language and environment for statistical computing. *R Foundation for*  
376 *Statistical Computing, Vienna, Austria.* <http://www.R-project.org/>.

377 van der Vliet, H.N., Sammels, M.G., Leegwater, A.C., Levels, J.H., Reitsma, P.H., Boers, W., et al.  
378 (2001). Apolipoprotein A-V: a novel apolipoprotein associated with an early phase of  
379 liver regeneration. *J Biol Chem* 276(48), 44512-44520. doi: 10.1074/jbc.M106888200.

380

381 Table 1. Baseline characteristics summarized by statin treatment and *APOA5* genotypes,  
382 respectively.

| Characteristics          | Statin treatment <sup>a</sup> |                    |                    | <i>P</i> <sup>b</sup> | <i>APOA5</i> genotype <sup>a</sup> |             | <i>P</i> <sup>c</sup> |
|--------------------------|-------------------------------|--------------------|--------------------|-----------------------|------------------------------------|-------------|-----------------------|
|                          | Atorvastatin                  | Rosuvastatin       | Simvastatin        |                       | T(C)/C                             | T/T         |                       |
| n                        | 36/29 <sup>d</sup>            | 30/35 <sup>d</sup> | 38/27 <sup>d</sup> | 0.342 <sup>c</sup>    | 104                                | 91          | -                     |
| Male (%)                 | 53.8                          | 44.6               | 49.2               | 0.575 <sup>c</sup>    | 45.2                               | 53.8        | 0.288 <sup>c</sup>    |
| Age (years)              | 74.9±10.5                     | 75.0±11.8          | 69.8±17.4          | 0.344                 | 72.8±12.8                          | 73.7±14.8   | 0.420                 |
| BMI (kg/m <sup>2</sup> ) | 23.5±3.2                      | 23.5±3.3           | 23.4±3.2           | 0.938                 | 23.5±3.5                           | 23.3±2.8    | 0.662                 |
| Tc (mg/dl)               | 193.1±49.5                    | 180.2±40.6         | 186.7±49.0         | 0.306                 | 191.9±45.3                         | 180.7±47.6  | 0.093                 |
| Tg (mg/dl)               | 180.1±110.5                   | 162.6±102.6        | 181.9±138.0        | 0.482                 | 193.7±124.8                        | 153.4±105.8 | 0.004                 |
| HDLc (mg/dl)             | 42.1±9.9                      | 44.1±10.4          | 44.6±11.5          | 0.458                 | 43.1±10.7                          | 44.1±10.6   | 0.513                 |
| LDLc (mg/dl)             | 132.2±42.9                    | 125.8±34.8         | 125.7±41.1         | 0.780                 | 134.7±40.6                         | 120.1±37.3  | 0.015                 |
| ApoA1 (mg/dl)            | 114.4±20.6                    | 119.1±23.3         | 116.9±20.1         | 0.515                 | 116.3±22.0                         | 117.3±20.7  | 0.708                 |
| ApoB-100 (mg/dl)         | 86.3±31.2                     | 86.5±25.0          | 94.1±29.2          | 0.181                 | 92.1±28.6                          | 85.4±28.5   | 0.145                 |
| ApoE (mg/dl)             | 4.4±1.5                       | 3.8±1.0            | 4.5±1.4            | 0.019                 | 4.4±1.3                            | 4.2±1.3     | 0.382                 |
| FFA (mmol/l)             | 0.5±0.2                       | 0.5±0.3            | 0.5±0.2            | 0.780                 | 0.5±0.2                            | 0.4±0.3     | 0.052                 |
| Lp(a) (mg/dl)            | 17.5±17.0                     | 18.0±15.4          | 19.8±17.9          | 0.916                 | 18.4±14.8                          | 18.4±18.8   | 0.575                 |
| Type 2 diabetes (%)      | 43.1                          | 40.0               | 32.3               | 0.430 <sup>c</sup>    | 40.4                               | 36.3        | 0.658 <sup>c</sup>    |

383 <sup>a</sup>Continuous variables are expressed as mean ± standard deviations (sd);

384 <sup>b</sup>*P* values were estimated by Krukskal-Wallis test for continuous variables;

385 <sup>c</sup>*P* values were estimated by Chi-square test for categorical variables;

386 <sup>d</sup>Sample sizes for individuals genotyped as T(C)/C and T/T, respectively;

387 <sup>e</sup>*P* values were estimated by Wilcox rank-sum test for continuous variables;

388 **Figure legends**

389 **Figure 1.** *APOA5*-statin interactions. (A) Box plots (with median) showing percentage changes in  
390 the indicated biomarkers after treatment with rosuvastatin (5-10 mg per day), atorvastatin (10-20  
391 mg per day) or simvastatin (40 mg per day). \*,  $P < 0.05$ ; \*\*,  $P < 0.01$ ; \*\*\*,  $P < 0.001$  versus before  
392 treatment. (Wilcoxon signed-rank test) (B-E) Box plots (with median) showing percentage  
393 changes in total cholesterol (Tc) (B), LDLc (C), HDLc (D), and triglycerides (Tg) (E) in response  
394 to each statin in subjects divided by genotype (*APOA5* rs662799 T(C)/C and T/T). Sample sizes  
395 for each subgroup are given on top of panels B-E. \*,  $P < 0.05$ ; \*\*,  $P < 0.01$  (Wilcoxon rank-sum  
396 test).

397 **Figure 2.** Both *APOA5* and statin alter the ApoB-LDLc correlations. Correlations between ApoB  
398 and LDLc before (A) and after (B) statin treatment in subjects with *APOA5* rs662799 T(C)/C or  
399 T/T allele.

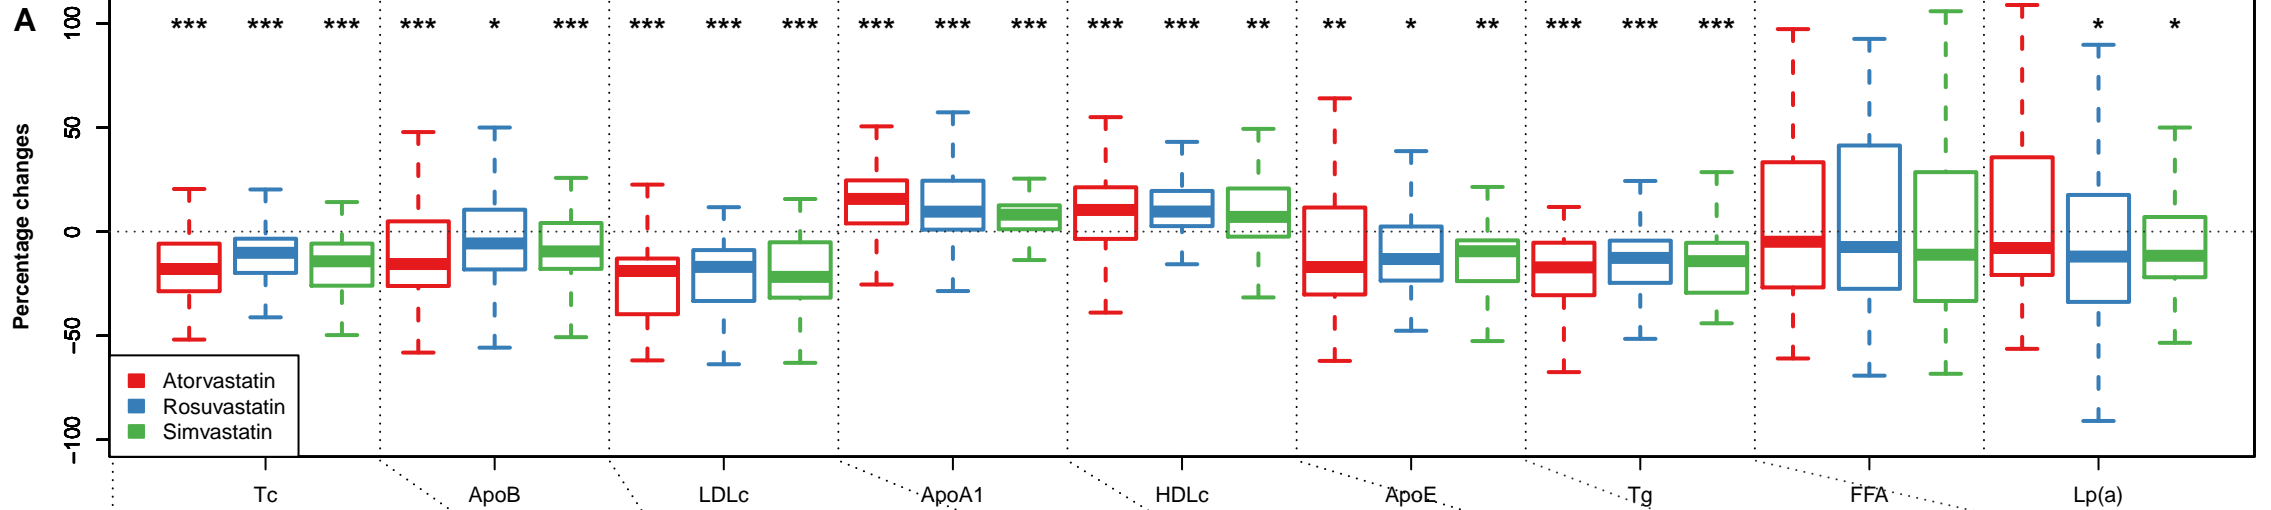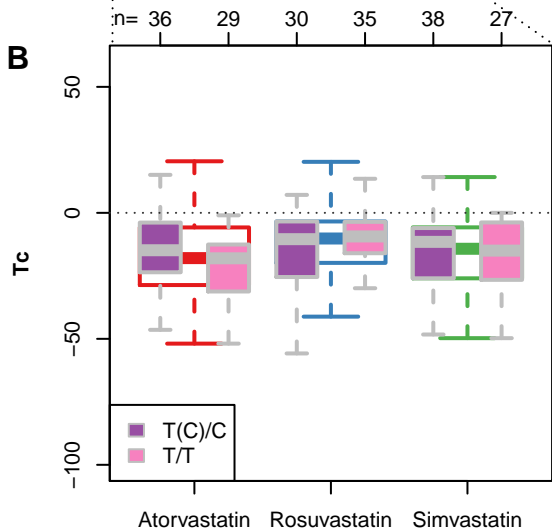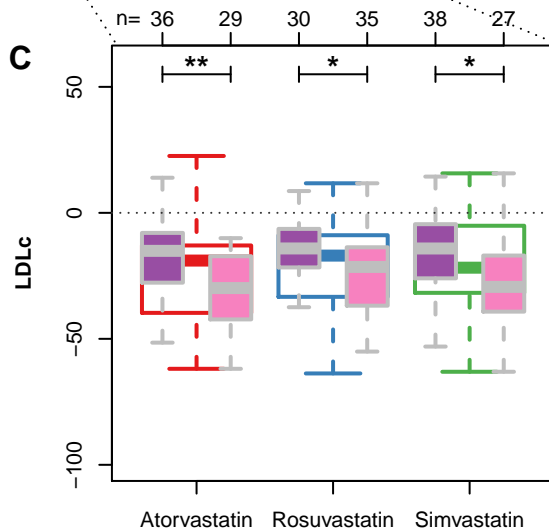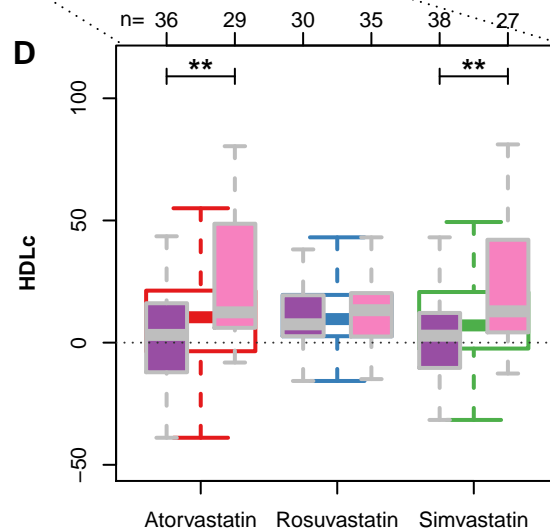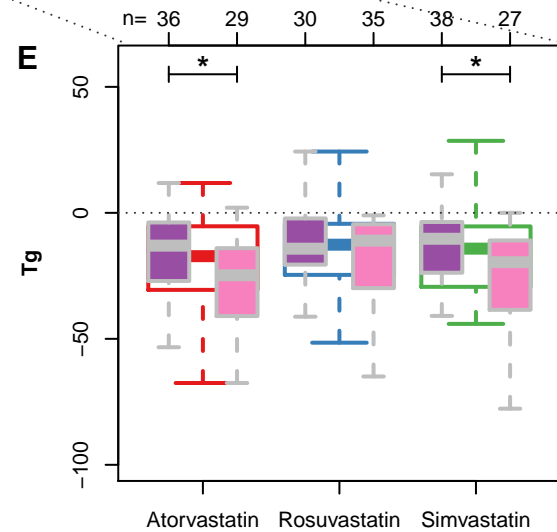



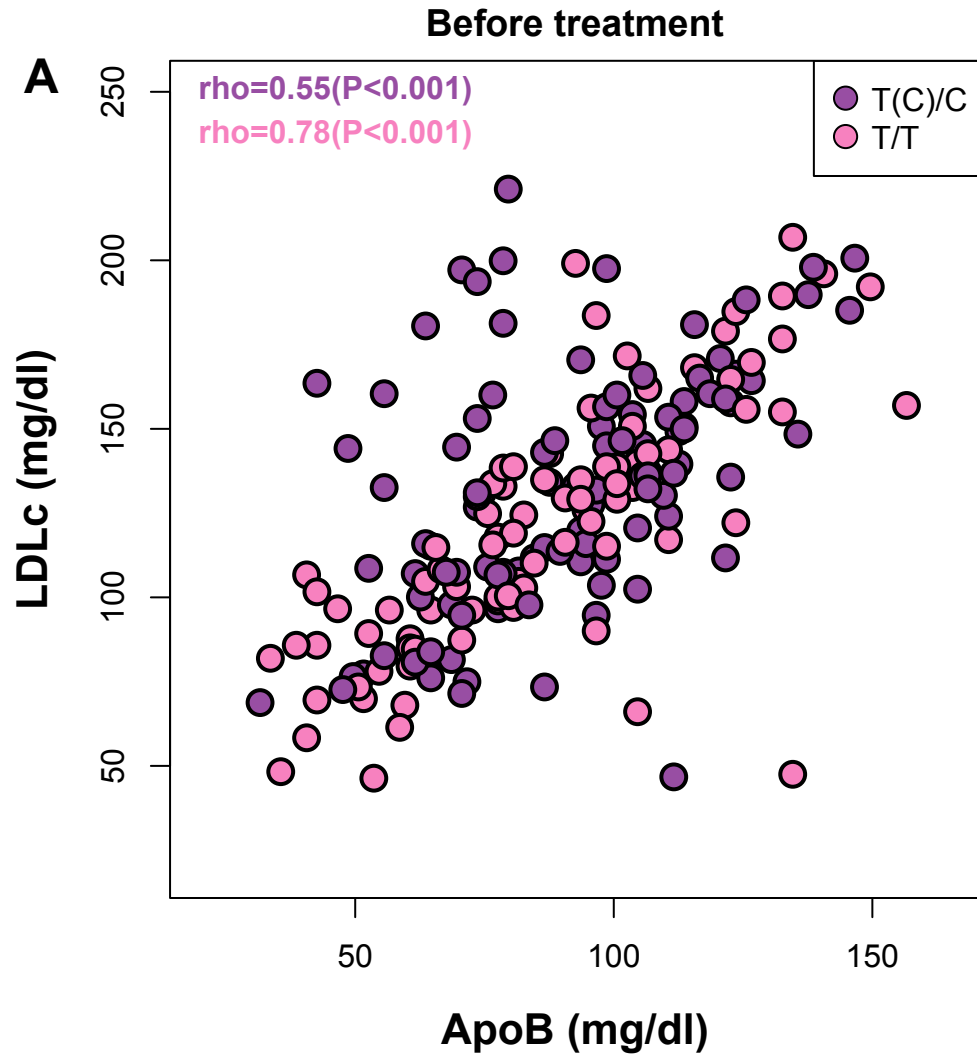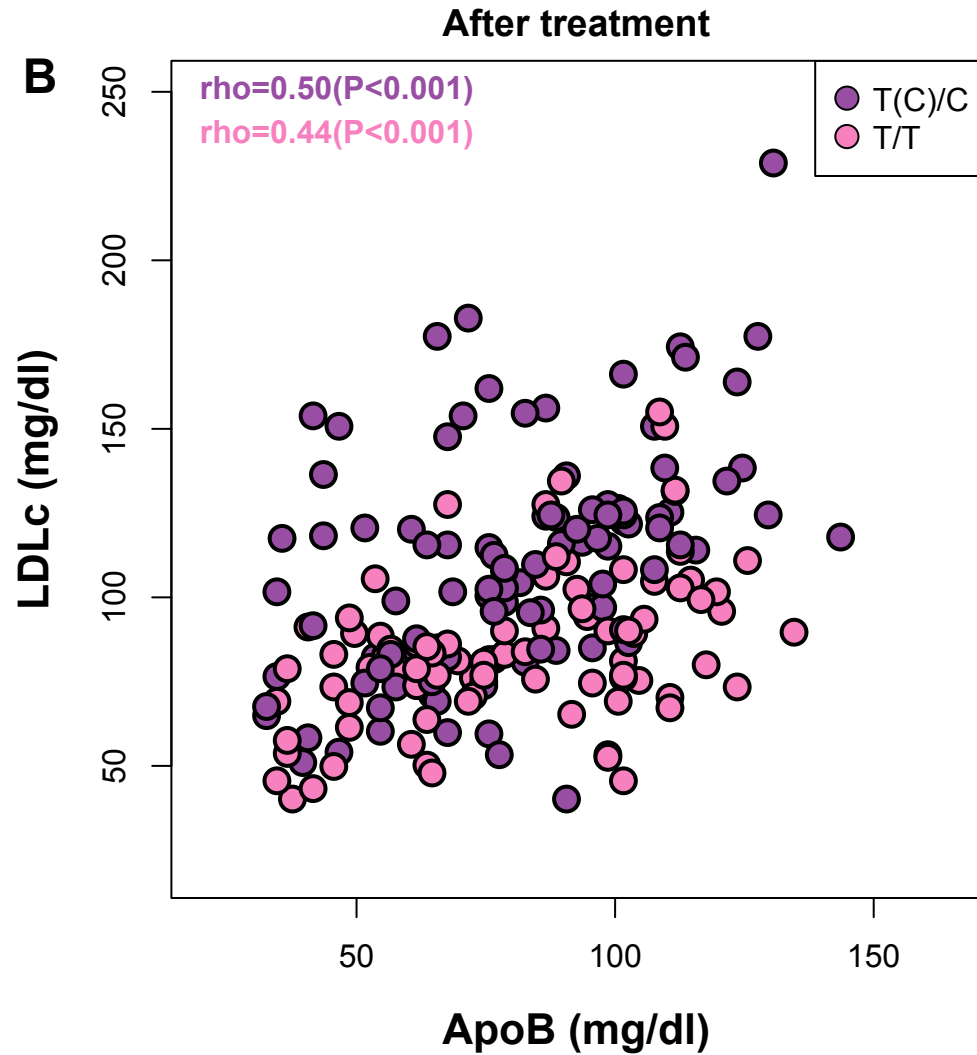

Source: https://www.biorxiv.org/content/10.1101/213629v2.full.pdf
